# Supplementary material for: Isogenic Cell Lines Derived from Specific Organ Metastases Exhibit Divergent Cytogenomic Aberrations
Source: MDPI journal article supplement (doi:10.3390/cancers15051420), 2023-02-23
Supplement: s1 [file s1]

Table S1. Relative to the 1<sup>o</sup> tumor cell line, fold change (F.C. > -1.5 & ≤ -1.25) of proteins in metastatic cell lines that if dysregulated contribute to CIN/aneuploidy and are then impacted by CIN/aneuploidy.

| Biological Process    | Protein  | Description                                                      | Chr Location | F.C. Brain   | F.C. Liver   | F.C. Lung    | F.C. Spine   |
|-----------------------|----------|------------------------------------------------------------------|--------------|--------------|--------------|--------------|--------------|
| Cell Cycle Regulation | ATAD2    | ATPase family, AAA domain containing 2                           | 8q24.13      | <u>-1.31</u> |              |              |              |
|                       | CCNB1    | Cyclin B1                                                        | 5q13.2       |              |              | -1.30        | <u>-1.26</u> |
|                       | CDC25B   | Cell division cycle 25B                                          | 20p13        | -1.34        |              |              |              |
|                       | CDCA3    | Cell division cycle associated 3                                 | 12p13.31     |              |              | <u>-1.39</u> |              |
|                       | CDK1     | Cyclin-dependent kinase 1                                        | 10q21.2      |              |              | -1.26        |              |
|                       | CDS1B    | CDC28 protein kinase regulatory subunit 1B                       | 1q21.3       |              | -1.37        |              |              |
|                       | FAM83D   | Family with sequence similarity 83 member D                      | 20q11.23     | -1.43        |              |              |              |
|                       | PA2G4    | Proliferation-associated 2G4                                     | 12q13.2      |              |              | -1.30        |              |
|                       | PBK      | PDZ binding kinase                                               | 8p21.1       | <u>-1.29</u> |              |              |              |
|                       | PRR11    | Proline rich 11                                                  | 17q22        |              | -1.34        |              |              |
|                       | UBEC2    | Ubiquitin conjugating enzyme E2C                                 | 20q13.12     |              | -1.28        | -1.25        |              |
|                       | UBE2S    | Ubiquitin conjugating enzyme E2S                                 | 19q13.42     | -1.47        |              |              |              |
|                       | WEE1     | WEE1 G2 checkpoint kinase                                        | 11p15.4      | -1.27        | -1.30        |              |              |
|                       | AURKA    | Aurora kinase A                                                  | 20q13.2      | -1.29        |              |              |              |
|                       | DTL      | Denticleless E3 ubiquitin protein ligase homolog (Drosophila)    | 1q32.3       | -1.32        |              |              |              |
|                       | GTSE1    | G2 and S-phase expressed 1                                       | 22q13.31     | -1.47        |              |              |              |
|                       | PLK1     | Polo-like kinase 1                                               | 16p12.2      | -1.34        |              |              |              |
| Centrosome Regulation | CCT3     | Chaperonin containing TCP1, subunit 3 gamma                      | 1q22         |              | -1.40        |              |              |
|                       | CEP152   | Centrosomal protein 152kDa                                       | 15q21.1      | -1.42        |              |              |              |
|                       | CEP192   | Centrosomal protein 192kDa                                       | 18p11.21     |              |              |              | -1.49        |
|                       | CEP72    | Centrosomal protein 72kDa                                        | 5p15.33      |              | -1.28        |              |              |
|                       | KIF24    | Kinesin family member 24                                         | 9p13.3       |              |              |              | <u>-1.24</u> |
| Cytokinesis           | ASPM     | Abnormal spindle microtubule assembly                            | 1q31.3       |              |              | <u>-1.30</u> |              |
|                       | CEP55    | Centrosomal protein 55kDa                                        | 10q23.33     | -1.33        |              |              |              |
|                       | CIT      | Citron Rho-interacting serine/threonine kinase                   | 12q24.23     | -1.45        |              |              |              |
|                       | KIF20A   | Kinesin family member 20A                                        | 5q31.2       | -1.30        |              |              |              |
|                       | KIF20B   | Kinesin family member 20B                                        | 10q23.31     | -1.27        |              |              |              |
|                       | PRC1     | Protein regulator of cytokinesis 1                               | 15q26.1      |              |              | -1.37        |              |
|                       | INCENP   | Inner centromere protein                                         | 11q12.3      | -1.27        |              |              |              |
|                       | ECT2     | Epithelial cell transforming 2                                   | 3q26.31      | -1.35        |              |              |              |
| Chromosome Partition  | BUB1     | BUB1, mitotic checkpoint serine/threonine kinase                 | 2q13         | -1.30        |              |              |              |
|                       | CDCA8    | Cell division cycle associated 8                                 | 1p34.3       | -1.30        |              |              |              |
|                       | ESPL1    | Extra spindle pole bodies like 1, separase                       | 12q13.13     | -1.47        |              |              |              |
|                       | KNL1     | Kinetochore scaffold 1                                           | 15q15.1      | -1.25        |              |              |              |
|                       | MIS18BP1 | MIS 18 binding protein 1                                         | 14q21.2      |              | <u>-1.33</u> |              |              |
|                       | SGO1     | Shugoshin 1                                                      | 3p24.3       | -1.28        |              |              |              |
|                       | CDCA2    | Cell division cycle associated 2                                 | 8p21.2       | -1.32        |              |              |              |
| DNA Condensation      | ESCO2    | Establishment of sister chromatid cohesion N-acetyltransferase 2 | 8q21.1       |              | -1.27        |              |              |
|                       | NCAPD3   | Non-SMC condensing II complex subunit D3                         | 11q25        | -1.36        |              |              |              |

|                               |        |                                                              |          |        |        |       |
|-------------------------------|--------|--------------------------------------------------------------|----------|--------|--------|-------|
|                               | NCAPG  | Non-SMC condensing I complex subunit G                       | 4p15.31  |        | -1.31  |       |
|                               | NCAPH  | Non-SMC condensing I complex subunit H                       | 2q11.2   | -1.40  | -1.27  |       |
|                               | SMC2   | Structural maintenance of chromosomes 2                      | 9q31.1   | -1.46  |        | -1.32 |
| Kinetochore Formation         | CENPI  | Centromere protein I                                         | Xq22.1   | -1.49  | -1.49  |       |
|                               | SPDL1  | Spindle apparatus coiled-coil protein 1                      | 5q35.1   |        |        | -1.30 |
|                               | NDC80  | NDC80 kinetochore complex component                          | 18p11.32 |        |        |       |
|                               | KNTC1  | Kinetochore associated 1                                     | 12q24.31 | -1.25  |        | -1.36 |
| Microtubule Regulation        | KIF15  | Diaphanous related formin 3                                  | 13q21.2  | -1.29  |        |       |
|                               | KIF18B | Kinesin family member 4A                                     | Xq13.1   | -1.43  |        |       |
|                               | SKA3   | Spindle and kinetochore associated complex subunit 3         | 13q12.11 |        |        | -1.39 |
|                               | PCNT   | Pericentrin                                                  | 21q22.3  | -1.32  |        |       |
|                               | STMN1  | Stathmin 1                                                   | 1q36.11  |        |        | -1.56 |
| Nuclear Envelope Regulation   | NUP85  | Nucleoporin 85kDa                                            | 17q25.1  |        | -1.43  | -1.37 |
|                               | NUP93  | Nucleoporin 93kDa                                            | 16p13    | -1.48  | -1.49  | -1.29 |
|                               | SUGT1  | SGT1 homolog, MIS12 kinetochore complex assembly cochaperone | 13q14.3  |        |        | -1.32 |
|                               | TMPO   | Thymopoietin                                                 | 12q23.1  |        |        | -1.30 |
|                               | VRK1   | Vaccinia related kinase 1                                    | 14q32.2  | -1.27  |        |       |
| Spindle Assembly & Regulation | HASPIN | Histone H3 associated protein kinase                         | 17p13.2  |        | -1.29  |       |
|                               | KIF11  | Kinesin family member 11                                     | 10q23.33 | -1.28  |        |       |
|                               | KPNB1  | Karyopherin (importin) beta 1                                | 17q21.32 | -1.29  | -1.353 | -1.40 |
|                               | WDR62  | WD repeat domain 62                                          | 19q13.12 |        |        | -1.28 |
|                               | HAUS7  | HAUS augmin like complex subunit 7                           | Xq28     |        | -1.28  |       |
| Spindle Checkpoint            | ANAPC1 | Anaphase promoting complex subunit 1                         | 2q13     | -1.330 |        |       |
|                               | BUB1B  | Mitotic checkpoint serine/threonine kinase B                 | 15q15.1  | -1.27  |        |       |
|                               | CDC20  | Cell division cycle 20                                       | 1p34.2   | -1.35  |        |       |
|                               | ERCC6L | Excision repair cross-complementation group 6-like           | Xq13.1   | -1.29  |        |       |
|                               | TRIP13 | Thyroid hormone receptor interactor 13                       | 5p15.33  |        |        | -1.36 |
|                               | ZW10   | ZW10 kinetochore protein                                     | 11q23.2  |        |        | -1.45 |
|                               | ZWILCH | ZWILCH kinetochore protein                                   | 15q22.31 |        | -1.31  | -1.46 |
| DNA Damage                    | ATPAD5 | ATPase family, AAA domain containing 5                       | 17q11.2  | -1.33  |        |       |
|                               | DONSON | DNA damage-induced apoptosis suppressor                      | 21q22.11 | -1.25  | -1.47  |       |
|                               | MTBP   | MDM2 binding protein                                         | 8q24.12  |        |        | -1.36 |
|                               | PARP2  | Poly(ADP-ribose) polymerase 2                                | 14q11.2  |        | -1.34  |       |
|                               | RAD18  | RAD18, E3 ubiquitin protein ligase                           | 3p25.3   |        |        |       |
|                               | RUVEL2 | RuvB-like AAA ATPase 2                                       | 19q13.33 |        | -1.32  |       |
|                               | TTI1   | TELO2 interacting protein 1                                  | 20q11.23 | -1.35  |        | -1.49 |
|                               | PCLAF  | PCNA clamp associated factor                                 | 15q22.31 |        | -1.34  |       |
|                               | DDX11  | DEAD/H (Asp-Glu-Ala-Asp/His) box helicase 11                 | 12p11.21 |        |        |       |
|                               | LIG1   | Ligase I, DNA, ATP-dependent                                 | 19q13.33 | -1.29  |        |       |
|                               | PARP1  | Poly(ADP-ribose) polymerase 1                                | 1q42.12  | -1.36  |        |       |

|                        |          |                                                                           |               |              |       |        |
|------------------------|----------|---------------------------------------------------------------------------|---------------|--------------|-------|--------|
|                        | RPA3     | Replication protein A3                                                    | 7p21.3        | -1.36        |       |        |
|                        | POLE     | Polymerase (DNA directed), epsilon catalytic subunit                      | 12q24.33      | -1.38        |       |        |
|                        | CHEK2    | Checkpoint kinase 2                                                       | 22q12.1       |              | -1.28 |        |
|                        | TIPIN    | TIMELESS interacting protein                                              | 15q22.31      | -1.40        |       |        |
|                        | PCNA     | Proliferating cell nuclear antigen                                        | 20p12.3       | -1.38        |       |        |
|                        | FIGL1    | Fidgetin-like 1                                                           | 7p12.2        | -1.47        |       |        |
|                        | HMGB1    | High mobility group box 1                                                 | 13q12.3       |              | -1.34 |        |
|                        | HMGB2    | High mobility group box 2                                                 | 4q34.1        |              | -1.44 |        |
|                        | NUCKS 1  | Nuclear casein kinase & cyclin-dependent kinase substrate 1               | 1q32.1        | -1.39        |       |        |
|                        | RAD54B   | RAD54 homolog B (S. cerevisiae)                                           | 8q22.1        | -1.38        |       |        |
|                        | CHEK1    | Checkpoint kinase 1                                                       | 11q24.2       |              |       |        |
|                        | BRCA2    | Breast cancer 2                                                           | 13q13.1       | -1.45        |       |        |
|                        | ATRIP    | ATR interacting protein                                                   | 3p21.31       |              |       |        |
|                        | FANCD2   | Fanconi anemia complementation group D2                                   | 3p25.3        | -1.27        |       |        |
|                        | FANCI    | Fanconi anemia complementation group I                                    | 15q26.1       | -1.31        | -1.27 |        |
|                        | USP1     | Ubiquitin specific peptidase 1                                            | 1p31.3        | -1.36        |       |        |
|                        | XRCC4    | X-ray repair complementing defective repair in Chinese hamster cells 4    | 5q14.3        |              | -1.34 |        |
|                        | XRCC6    | X-ray repair complementing defective repair in Chinese hamster cells 6    | 22q13.2       |              | -1.47 | -1.34  |
| DNA Replication        | RMI1     | RecQ mediated genome instability 1                                        | 9q21.32       | <u>-1.26</u> |       |        |
|                        | POLA1    | Polymerase (DNA directed), alpha 1, catalytic subunit                     | Xp22.11-p21.3 | <u>-1.41</u> |       |        |
|                        | POLE2    | Polymerase (DNA directed), epsilon 2, accessory subunit                   | 14q21.3       | <u>-1.26</u> | -1.35 |        |
|                        | POLE3    | Polymerase (DNA directed), epsilon 3, accessory subunit                   | 9q32          | -1.38        |       |        |
|                        | RFC3     | Replication factor C subunit 3                                            | 13q13.2       |              |       | -1.266 |
|                        | RFC5     | Replication factor C subunit 5                                            | 12q24.23      | <u>-1.46</u> |       |        |
|                        | TOPBP1   | Topoisomerase (DNA) II binding protein 1                                  | 3q22.1        | -1.26        |       |        |
|                        | WRAP53   | WD repeat containing, antisense to TP53                                   | 17p13.3       | -1.38        |       |        |
| DNA Metabolism         | DCK      | Deoxycytidine kinase                                                      | 4q13.3        | <u>-1.33</u> |       |        |
|                        | DCTPP1   | dCTP pyrophosphatase 1                                                    | 16p11.2       | -1.36        | -1.45 |        |
|                        | DHFR     | Dihydrofolate reductase                                                   | 5q14.1        |              | -1.38 |        |
|                        | DTYMK    | Deoxythymidylate kinase                                                   | 2q37.3        | -1.25        | -1.38 | -1.29  |
|                        | DUT      | Deoxyuridine triphosphatase                                               | 15q21.1       | -1.47        | -1.31 |        |
|                        | PRPS2    | Phosphoribosyl pyrophosphate synthetase 2                                 | Xp22.2        | -1.30        |       |        |
|                        | RRM2     | Ribonucleotide reductase M2                                               | 2q25.1        | -1.36        |       |        |
|                        | SLC29A1  | Solute carrier family 29 (equilibrative nucleoside transporter), member 1 | 6p21.1        | -1.36        |       |        |
|                        | TK1      | Thymidine kinase 1, soluble                                               | 17q25.3       | -1.34        | -1.25 |        |
|                        | TYMS     | Thymidylate synthetase                                                    | 18p11.32      | -1.49        | -     |        |
| Chromatin Organization | ANP32B   | Acidic nuclear phosphoprotein 32 family member B                          | 9q22.33       | -1.38        |       |        |
|                        | HIST1H1C | Histone cluster 1, H1c                                                    | 6p22.2        | -1.26        |       |        |
|                        | HIST1H4A | Histone cluster 1, H4a                                                    | 6p22.2        | -1.43        |       |        |

|          |                        |        |       |
|----------|------------------------|--------|-------|
| HIST1H4B | Histone cluster 1, H4b | 6p22.2 | -1.43 |
| HIST1H4C | Histone cluster 1, H4c | 6p22.2 | -1.43 |
| HIST1H4D | Histone cluster 1, H4d | 6p22.2 | -1.43 |
| HIST1H4E | Histone cluster 1, H4e | 6p22.2 | -1.43 |
| HIST1H4F | Histone cluster 1, H4f | 6p22.2 | -1.43 |
| HIST1H4I | Histone cluster 1, H4i | 6p22.2 | -1.43 |
| HIST1H4J | Histone cluster 1, H4j | 6p22.2 | -1.43 |
| HIST1H4K | Histone cluster 1, H4k | 6p22.2 | -1.43 |
| HIST1H4L | Histone cluster 1, H4l | 6p22.2 | -1.43 |
| HIST2H4B | Histone cluster 2, H4b | 1q21.2 | -1.43 |

Yellow-beige shadings indicates that no gene counterparts were observed for the proteins in these processes.

Table S2. Relative to the 1<sup>o</sup> tumor cell line, fold change (F.C.  $\geq 1.25$ ) of proteins in metastatic cell lines that if dysregulated contribute to CIN/aneuploidy and are then impacted by CIN/aneuploidy.

| Biological Process     | Protein   | Description                                                            | Chr Location | F.C. Brain  | F.C. Liver  | F.C. Lung   | F.C. Spine  |
|------------------------|-----------|------------------------------------------------------------------------|--------------|-------------|-------------|-------------|-------------|
| Centrosome Regulation  | CEP152    | Centrosomal protein 152kDa                                             | 15q21.1      |             | <u>1.30</u> | <u>1.27</u> | 1.48        |
|                        | CEP41     | Centrosomal protein 41kDa                                              | 7q32.2       |             |             | 1.27        |             |
|                        | Kif24     | Kinesin family member 24                                               | 9p13.3       |             |             | <u>1.43</u> |             |
|                        | SASS6     | SAS-6 centriolar assembly protein                                      | 1p21.2       |             |             |             | 1.31        |
| Kinetochores Formation | CENPU     | Centromere protein U                                                   | 4q35.1       |             |             | 1.31        | 1.50        |
|                        | MIS18A    | MIS18 kinetochores protein A                                           | 1q41         | 1.86        |             |             | 1.42        |
| Microtubule Regulation | STATHN1   | Stathmin 1                                                             | 1p36.11      | 1.28        |             |             |             |
| DNA Damage             | PARP2     | Poly(ADP-ribose) polymerase 2                                          | 14q11.2      | 1.37        |             |             | 1.29        |
|                        | HMGB1     | High mobility group box 1                                              | 13q12.3      | <u>1.29</u> |             |             |             |
|                        | HMGB2     | High mobility group box 2                                              | 4q34.1       | 1.53        |             |             |             |
|                        | INC       | INTS3 and NABP interacting protein                                     | 9q32         | 1.34        | 1.84        | 1.25        |             |
|                        | NSMCE4A   | NSE4 homolog A, SMC5-SMC6 complex component                            | 10q26.13     | 1.27        |             |             |             |
|                        | NUCKS1    | Nuclear casein kinase & cyclin-dependent kinase substrate 1            | 1q32.1       |             |             |             | 1.28        |
|                        | XRCC1     | X-ray repair complementing defective repair in Chinese hamster cells 1 | 19q13.31     |             |             | 1.25        |             |
|                        | MDC1      | Mediator of DNA damage checkpoint 1                                    | 6p21.33      |             |             | 1.47        |             |
| DNA Replication        | NASP      | Nuclear autoantigenic sperm protein (histone-binding)                  | 1p34.1       | 1.32        |             |             |             |
|                        | CDC6      | Cell division cycle 6                                                  | 17q21.2      |             |             | 1.44        | <u>1.82</u> |
|                        | ORC1      | Origin recognition complex subunit 1                                   | 1p23.3       | 1.36        | 1.36        |             |             |
|                        | ORC2      | Origin recognition complex subunit 2                                   | 2q33.1       | 1.32        |             |             |             |
|                        | DBF4      | DBF4 zinc finger                                                       | 7q21.12      |             |             |             | 1.41        |
| Chromatin Organization | HIST1H1B  | Histone cluster 1, H1b                                                 | 6p22.1       |             |             |             | 1.31        |
|                        | HIST1H1C  | Histone cluster 1, H1c                                                 | 6p22.2       |             |             | <u>1.28</u> | <u>1.27</u> |
|                        | HIST1H2AC | Histone cluster 1, H2ac                                                | 6p22.2       |             | <u>1.29</u> | <u>1.25</u> | 1.27        |
|                        | HIST1H3A  | Histone cluster 1, H3a                                                 | 6p22.2       | 1.48        | 1.25        |             |             |
|                        | HIST1H3B  | Histone cluster 1, H3b                                                 | 6p22.2       | 1.48        | 1.25        |             |             |
|                        | HIST1H3C  | Histone cluster 1, H3c                                                 | 6p22.2       | 1.48        | 1.25        |             |             |

|            |                          |        |             |             |
|------------|--------------------------|--------|-------------|-------------|
| HIST1H3D   | Histone cluster 1, H3d   | 6p22.2 | 1.48        | 1.25        |
| HIST1H3F   | Histone cluster 1, H13f  | 6p22.2 | 1.48        | 1.25        |
| HIST1H3G   | Histone cluster 1, H3g   | 6p22.2 | 1.48        | 1.25        |
| HIST1H3I   | Histone cluster 1, H3i   | 6p22.2 | 1.48        | 1.25        |
| HIST1H3J   | Histone cluster 1, H3j   | 6p22.2 | 1.48        | 1.25        |
| HIST1H4A   | Histone cluster 1, H4a   | 6p22.2 | 1.40        |             |
| HIST1H4B   | Histone cluster 1, H4b   | 6p22.2 | 1.40        |             |
| HIST1H4C   | Histone cluster 1, H4c   | 6p22.2 | 1.40        |             |
| HIST1H4D   | Histone cluster 1, H4d   | 6p22.2 | 1.40        |             |
| HIST1H4E   | Histone cluster 1, H4e   | 6p22.2 | 1.40        |             |
| HIST1H4F   | Histone cluster 1, H4f   | 6p22.2 | 1.40        |             |
| HIST1H4I   | Histone cluster 1, H4i   | 6p22.1 | 1.40        |             |
| HIST1H4J   | Histone cluster 1, H4j   | 6p22.1 | <u>1.40</u> |             |
| HIST1H4K   | Histone cluster 1, H4k   | 6p22.1 | 1.40        |             |
| HIST1H4L   | Histone cluster 1, H4l   | 6p22.1 | 1.40        |             |
| HIST2H2AA4 | Histone cluster 2, H2AA4 | 1q21.2 |             | <u>1.78</u> |
| HIST2H4B   | Histone cluster 2, H4b   | 1q21.2 | <u>1.40</u> | 1.25        |

Yellow-beige shadings indicates that no gene counterparts were observed for the proteins in these processes.

## **Supplemental Materials**

### **Figures**

Paul T Winnard Jr<sup>1</sup>, Laura Morsberger<sup>2</sup>, Raluca Yonescu<sup>2</sup>, Liqun Jiang<sup>2</sup>, Ying S. Zou<sup>2\*</sup>, Venu Raman<sup>1,3,4,5\*</sup>

<sup>1</sup> Department of Radiology and Radiological Sciences, Johns Hopkins University School of Medicine, Baltimore, MD, USA

<sup>2</sup>Department of Pathology, Johns Hopkins University School of Medicine, Baltimore, MD, USA

<sup>3</sup>Department of Oncology, Johns Hopkins University School of Medicine, Baltimore, MD, USA

<sup>4</sup>Pharmacology and Molecular Sciences, Johns Hopkins School of Medicine, Baltimore, MD, USA

<sup>5</sup>Department of Pathology, University Medical Center Utrecht, Utrecht, The Netherlands

## Supplemental Figure Legends

**Supplemental Figure S1.** Comparisons of brain cell line karyotypes to lung and spine cell line karyotypes as well as a comparison of lung cell line karyotypes to spine cell line karyotypes. Detailed modal descriptions of the comparisons are presented here. In all three comparisons distinctions in karyotypes are highlighted. Inter-karyotype heterogeneity between the 1<sup>o</sup> tumor cell line karyotype (see Figures 2 and 3) and the liver, lung, and spine cell line karyotypes are indicated by blue arrows. Intra-karyotype heterogeneity is indicated by orange arrows for the 5 brain (**Br-1 – Br-5**) cell line karyotypes, green arrows for the 3 lung (**Lu-1 – Lu-3**) cell line karyotypes, and a red arrow for the 2 spine (**Sp-1 & Sp-2**) cell line karyotypes.

**Modal brain cell line karyotype:** 56,XX,+1,der(1;7)(q10;q10),add(1)(q21),+2,add(3)(p25),add(3)(p14),+add(3)(q12),+5,-6, add(6)(q13)x2,+dup(6)(p21.3p22),+7,i(7)(q10),-8,-8,+9,inv(9)(q13q?22),+11,add(11)(p14),add(11)(p14),del(12)(p12),-13,-13,-14, +15,add(15)(p11.2),add(18)(p11.2),-19,add(19)(p13),add(20)(q13.2)x2,-21,-22,+mar1,+mar2,+mar3,+mar4,+mar6,+mar10,+mar12,+mar13,+mar

Compared to:

**Modal lung cell line karyotype:** 55,XX,+1,der(1;7)(q10;q10),add(1)(q21),+2,add(3)(p25),add(3)(p14),+add(3)(q12),+4,+5,dup(6)(p21.3p22),i(7)(q10),-8,-8,+9,inv(9)(q13q?22),+11,add(11)(p14),add(11)(p14),del(12)(p12),-13,-13,-14,add(15)(p11.2),add(18)(p11.2),-19,add(19)(p13), add(20)(q13.2)x2,-21,-22,+mar1,+mar2,+mar3,+mar4,+mar5,+mar6,+mar7,+mar8,+mar11,+mar

**Modal brain cell line karyotype:** 56,XX,+1,der(1;7)(q10;q10),add(1)(q21),+2,add(3)(p25),add(3)(p14),+add(3)(q12),+5,-6, add(6)(q13)x2,+dup(6)(p21.3p22),+7,i(7)(q10),-8,-8,+9,inv(9)(q13q?22),+11,add(11)(p14),add(11)(p14),del(12)(p12),-13,-13,-14, +15,add(15)(p11.2),add(18)(p11.2),-19,add(19)(p13),add(20)(q13.2)x2,-21,-22,+mar1,+mar2,+mar3,+mar4,+mar6,+mar10,+mar12,+mar13,+mar

Compared to:

**Modal spine cell line karyotype:** 56,XX,+1,der(1;7)(q10;q10),add(1)(q21),+2,add(3)(p25),add(3)(p14),+5,add(6)(q13)x2,+dup(6)(p21.3p22),+7,i(7)(q10),-8,-8,+9,inv(9)(q13q?22),+11,add(11)(p14),add(11)(p14),del(12)(p12),-13,-13,-14,+15,add(15)(p11.2),add(18)(p11.2),-19, add(19)(p13),add(20)(q13.2)x2,-21,-22,+mar1,+mar2,+mar3,+mar6,+mar7,+mar10,+mar12,+mar13,+2mar

**Modal lung cell line karyotype:** 55,XX,+1,der(1;7)(q10;q10),add(1)(q21),+2,add(3)(p25),add(3)(p14),+add(3)(q12),+4,+5,dup(6)(p21.3p22),i(7)(q10),-8,-8,+9,inv(9)(q13q?22),+11,add(11)(p14),add(11)(p14),del(12)(p12),-13,-13,-14,add(15)(p11.2),add(18)(p11.2),-19, add(19)(p13),add(20)(q13.2)x2,-21,-22,+mar1,+mar2,+mar3,+mar4,+mar5,+mar6,+mar7,+mar8,+mar11,+mar

Compared to:

**Modal spine cell line karyotype:** 56,XX,+1,der(1;7)(q10;q10),add(1)(q21),+2,add(3)(p25),add(3)(p14),+5,add(6)(q13)x2, +dup(6)(p21.3p22),+7,i(7)(q10),-8,-8,+9,inv(9)(q13q?22),+11,add(11)(p14),add(11)(p14),del(12)(p12),-13,-13,-14,+15, add(15)(p11.2),add(18)(p11.2),-19,add(19)(p13),add(20)(q13.2)x2,-21,-22,+mar1,+mar2,+mar3,+mar6,+mar7,+mar10, +mar12,+mar13,+2mar

## Supplemental Figure Legends

**Supplemental Figure S2.** Comparisons of liver cell line karyotypes to lung and spine cell line karyotypes. Detailed modal descriptions of the comparisons are presented here. In the two comparisons distinctions in karyotypes are highlighted. Inter-karyotype heterogeneity between the 1<sup>o</sup> tumor cell line karyotype (see Figures 2 and 3) and the liver, lung, and spine cell line karyotypes are indicated by blue arrows. Intra-karyotype heterogeneity is indicated by violet arrows for the 5 liver (Li-1 – Li-5) cell line karyotypes, green arrows for the 3 lung (Lu-1 – Lu-3) cell line karyotypes, and a red arrow for the 2 spine (Sp-1 & Sp-2) cell line karyotypes.

**Modal liver cell line karyotype:** 56,XX,+1,der(1;7)(q10;q10),add(1)(q21),+2,add(3)(p25),add(3)(p14),+add(3)(q12),+5,-6, dup(6)(p21.3p22),+7,i(7)(q10),-8,-8,+9,inv(9)(q13q?22),-10,+11,add(11)(p14),add(11)(p14),del(12)(p12),-13,-13,-14,+15, add(15)(p11.2),add(18)(p11.2),-19,add(19)(p13),add(20)(q13.2)x2,-21,-22,+mar1,+mar3,+mar4,+mar6,+mar7,+mar8, +mar11,+mar12,+mar13,+3mar  
Compared to:

**Modal lung cell line karyotype:** 55,XX,+1,der(1;7)(q10;q10),add(1)(q21),+2,add(3)(p25),add(3)(p14),+add(3)(q12),+4,+5,dup(6)(p21.3p22),i(7)(q10),-8,-8,+9, inv(9)(q13q?22),+11,add(11)(p14),add(11)(p14),del(12)(p12),-13,-13,-14,add(15)(p11.2),add(18)(p11.2),-19,add(19)(p13), add(20)(q13.2)x2,-21,-22,+mar1,+mar2,+mar3,+mar4,+mar5,+mar6,+mar7,+mar8,+mar11,+mar

**Modal liver cell line karyotype:** 56,XX,+1,der(1;7)(q10;q10),add(1)(q21),+2,add(3)(p25),add(3)(p14),+add(3)(q12),+5,-6, dup(6)(p21.3p22),+7,i(7)(q10),-8,-8,+9,inv(9)(q13q?22),-10,+11,add(11)(p14),add(11)(p14),del(12)(p12),-13,-13,-14,+15, add(15)(p11.2),add(18)(p11.2),-19,add(19)(p13),add(20)(q13.2)x2,-21,-22,+mar1,+mar3,+mar4,+mar6,+mar7,+mar8,+mar11, +mar12,+mar13,+3mar  
Compared to:

**Modal spine cell line karyotype:** 56,XX,+1,der(1;7)(q10;q10),add(1)(q21),+2,add(3)(p25),add(3)(p14),+5,add(6)(q13)x2, +dup(6)(p21.3p22),+7,i(7)(q10),-8,-8,+9,inv(9)(q13q?22),+11,add(11)(p14),add(11)(p14),del(12)(p12),-13,-13,-14,+15, add(15)(p11.2),add(18)(p11.2),-19,add(19)(p13),add(20)(q13.2)x2,-21,-22,+mar1,+mar2,+mar3,+mar6,+mar7,+mar10,+mar12, +mar13,+2mar



Supplemental Figure S1

Brain

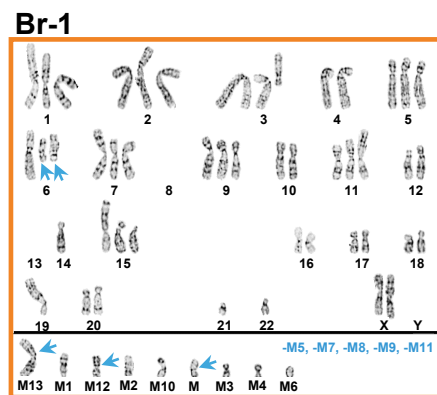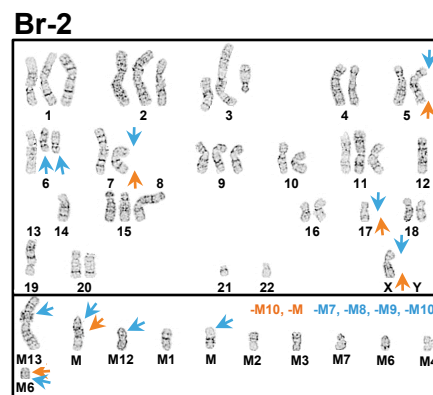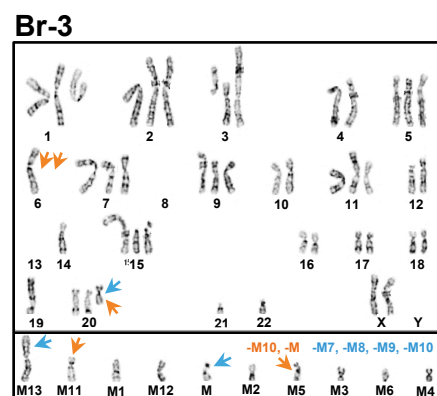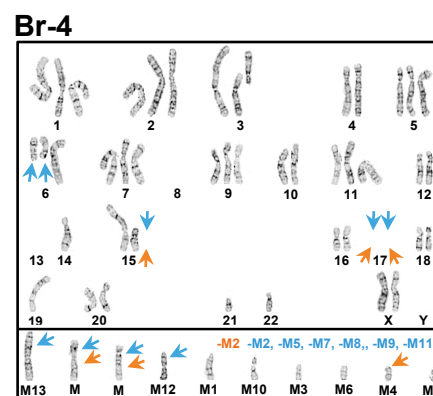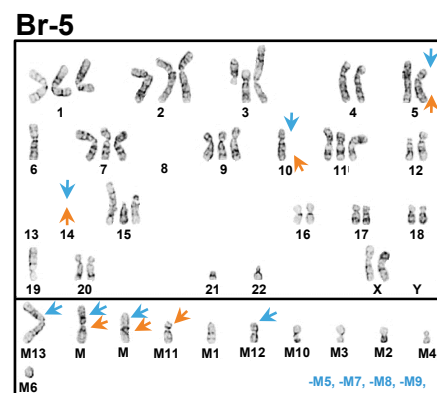

Lung

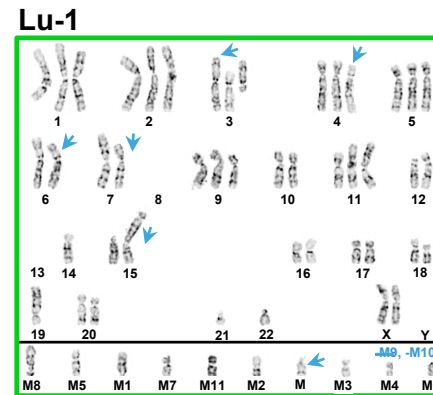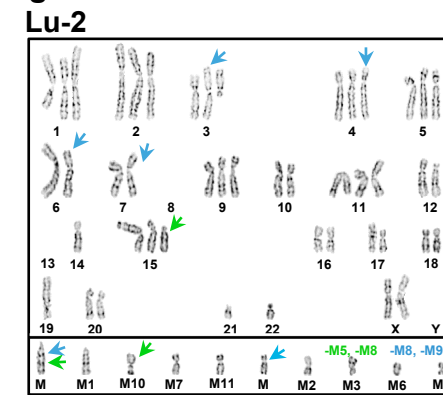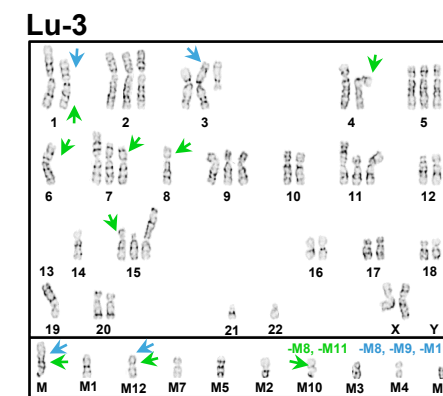

Spine

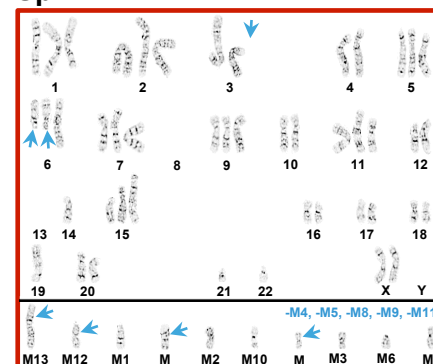

Spine

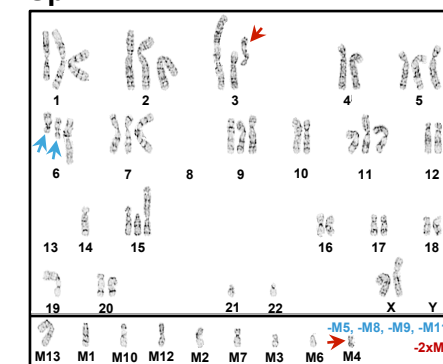

Liver

Lung

Li-1

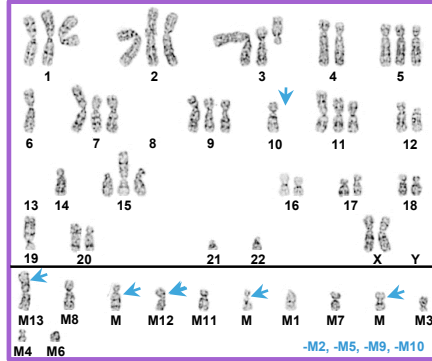

Li-2

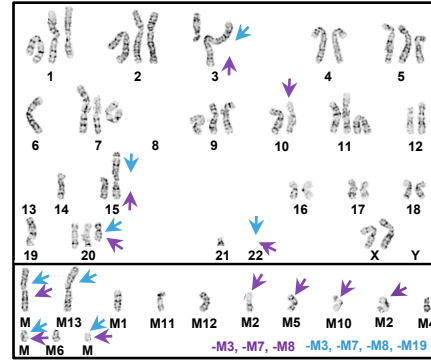

Lu-1

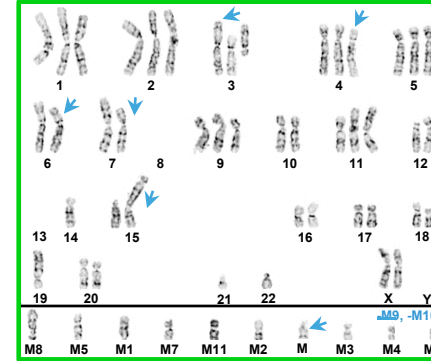

Lu-2

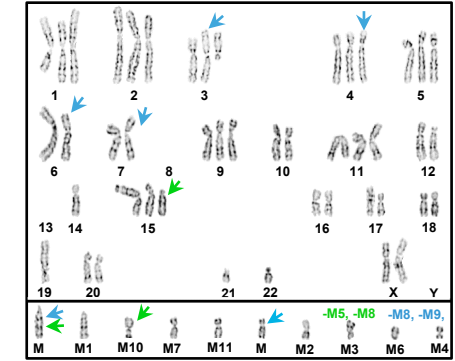

Li-3

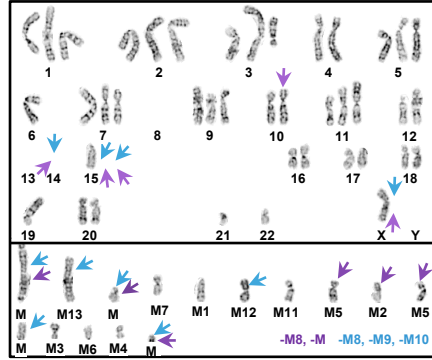

Li-4

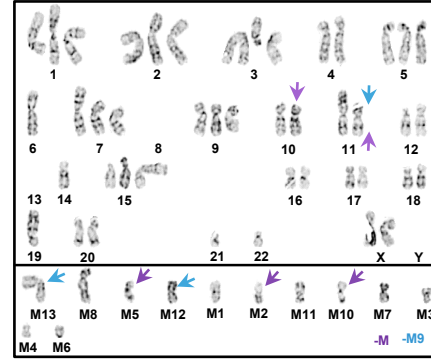

Lu-3

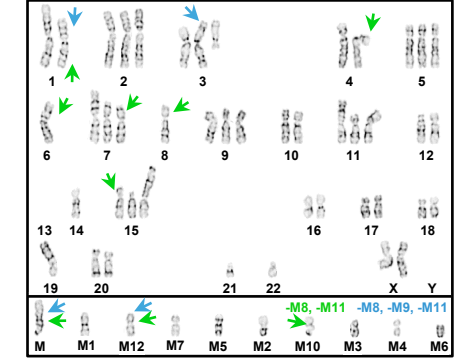

Li-5

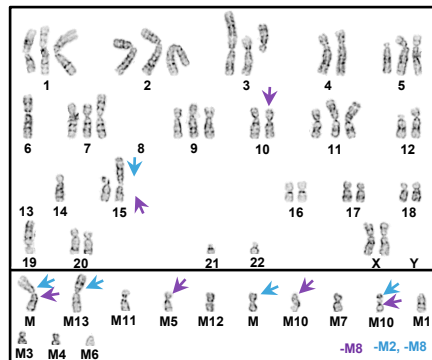

Sp-1

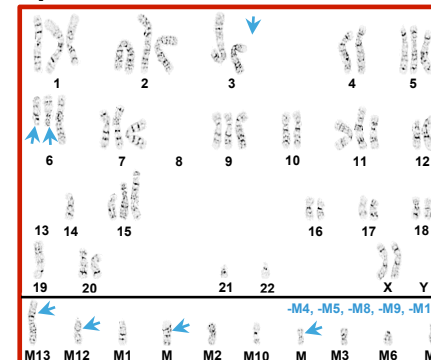

Sp-2

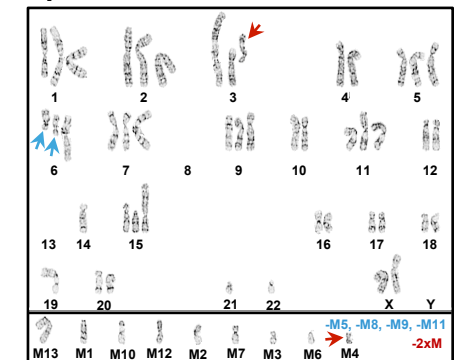

Spine
